# Supplementary material
Source: publisher site journal article supplement (https://www.dovepress.com/article/494703)

**Supplementary** **Table S1. The specific primer sequences and Taqman probes for 12 DNA methylation markers.**

| Name | Forward Sequence (5’ to 3’) | Reverse Sequence (5’ to 3’) | Probe Sequence (5’ to 3’) |
| --- | --- | --- | --- |
| mFAM19A4 | CGGAGTGGTGGTTATAGCGAGGC | CCCGCGATCCACGTAAACCG | CGGGAGAGGCGTTTGGAGGTCGGTA |
| mPHACTR3 | CGGATGTTTTGATTTTACGCGGTTC | CCCGCGACACGAAACAACCG | TTCGCGTCGGTCGGGTTTATGGTC |
| mSST | CGGAGTTATCGTTGTTGTTTGTTGATTCGC | GCAACCAACGCGCACTAAAAACG | TCGCGGCGTCGAGATGTTGTTTTG |
| mZIC1 | AGCGGCGAGAAAGTGCGAGTC | CGAACCAAACGCAAAATAACCGAACG | TTGGCGGGCGTTGGAGTTTGCGTTATTC |
| mPAX1 | GTTGTTAATTCGCGCGTTTTCGGC | TCGTCTAACCGAAAAACTACAACGTACG | GTGATTGTCGAGATTGACGTGGAGGATACG |
| mCADM1 | GCGTTGTGATTGGTTTGTTCGGATTTC | TCGAACACCTACCTCAAACTAACGACG | TAGTTGTTCGTTCGGGTTTCGGAGGTAG |
| mJAM3 | TGGTGTCGGTTCGGTTGGGTTC | AACCAACGACAACGCGACGCG | TCGTAGGGTTTTGGTAGGTTGGGCGTATGC |
| mZNF671 | CGGGGTTTTGTAACGTTTGTGTGGGTC | GAAAACGACAAACGTCTCGATCGAAAACG | CGAGACGCGTTTGATGTTTTGTAGGGAC |
| mPRDM14 | ATTAGCGGGTTAGACGTCGTTTTCG | CGAACTCGCGTCCCGAAATCG | TGGGATTTTTCGAATTGGGAGCGGAGAG |
| mSFRP4 | GTTGTTAAGGGAGCGTTTCGAGTTTAC | GAACAACTCCAATCCCGAACTCCG | TCGTAATGGTCGTGGTTGGTTGCGTTTC |
| mEPB41L3 | CGGTTGGGAGGGTAGGTAGGAC | CTATTACAAAAAACACCGAAACTCCGCG | CGTACGGTTTTTGGGCGTGGGTTTTCG |
| mSOX1 | GCGCGTTATGTAAATTATCGTCGTCGTC | GCGCGAAACCCAACAACCATACG | CGGCGCGTTTATTTAATGGTAGTTCGGGTTC |
| mACTB | GGAGGTAGGGAGTATATAGGTTGGGGAAG | CCACCACCCAACACACAATAACAAACAC | TGGGGTGGTGATGGAGGAGGTTTAGTAAG |

**Supplementary Figure S1. The methylation levels validated by Sanger sequencing.**


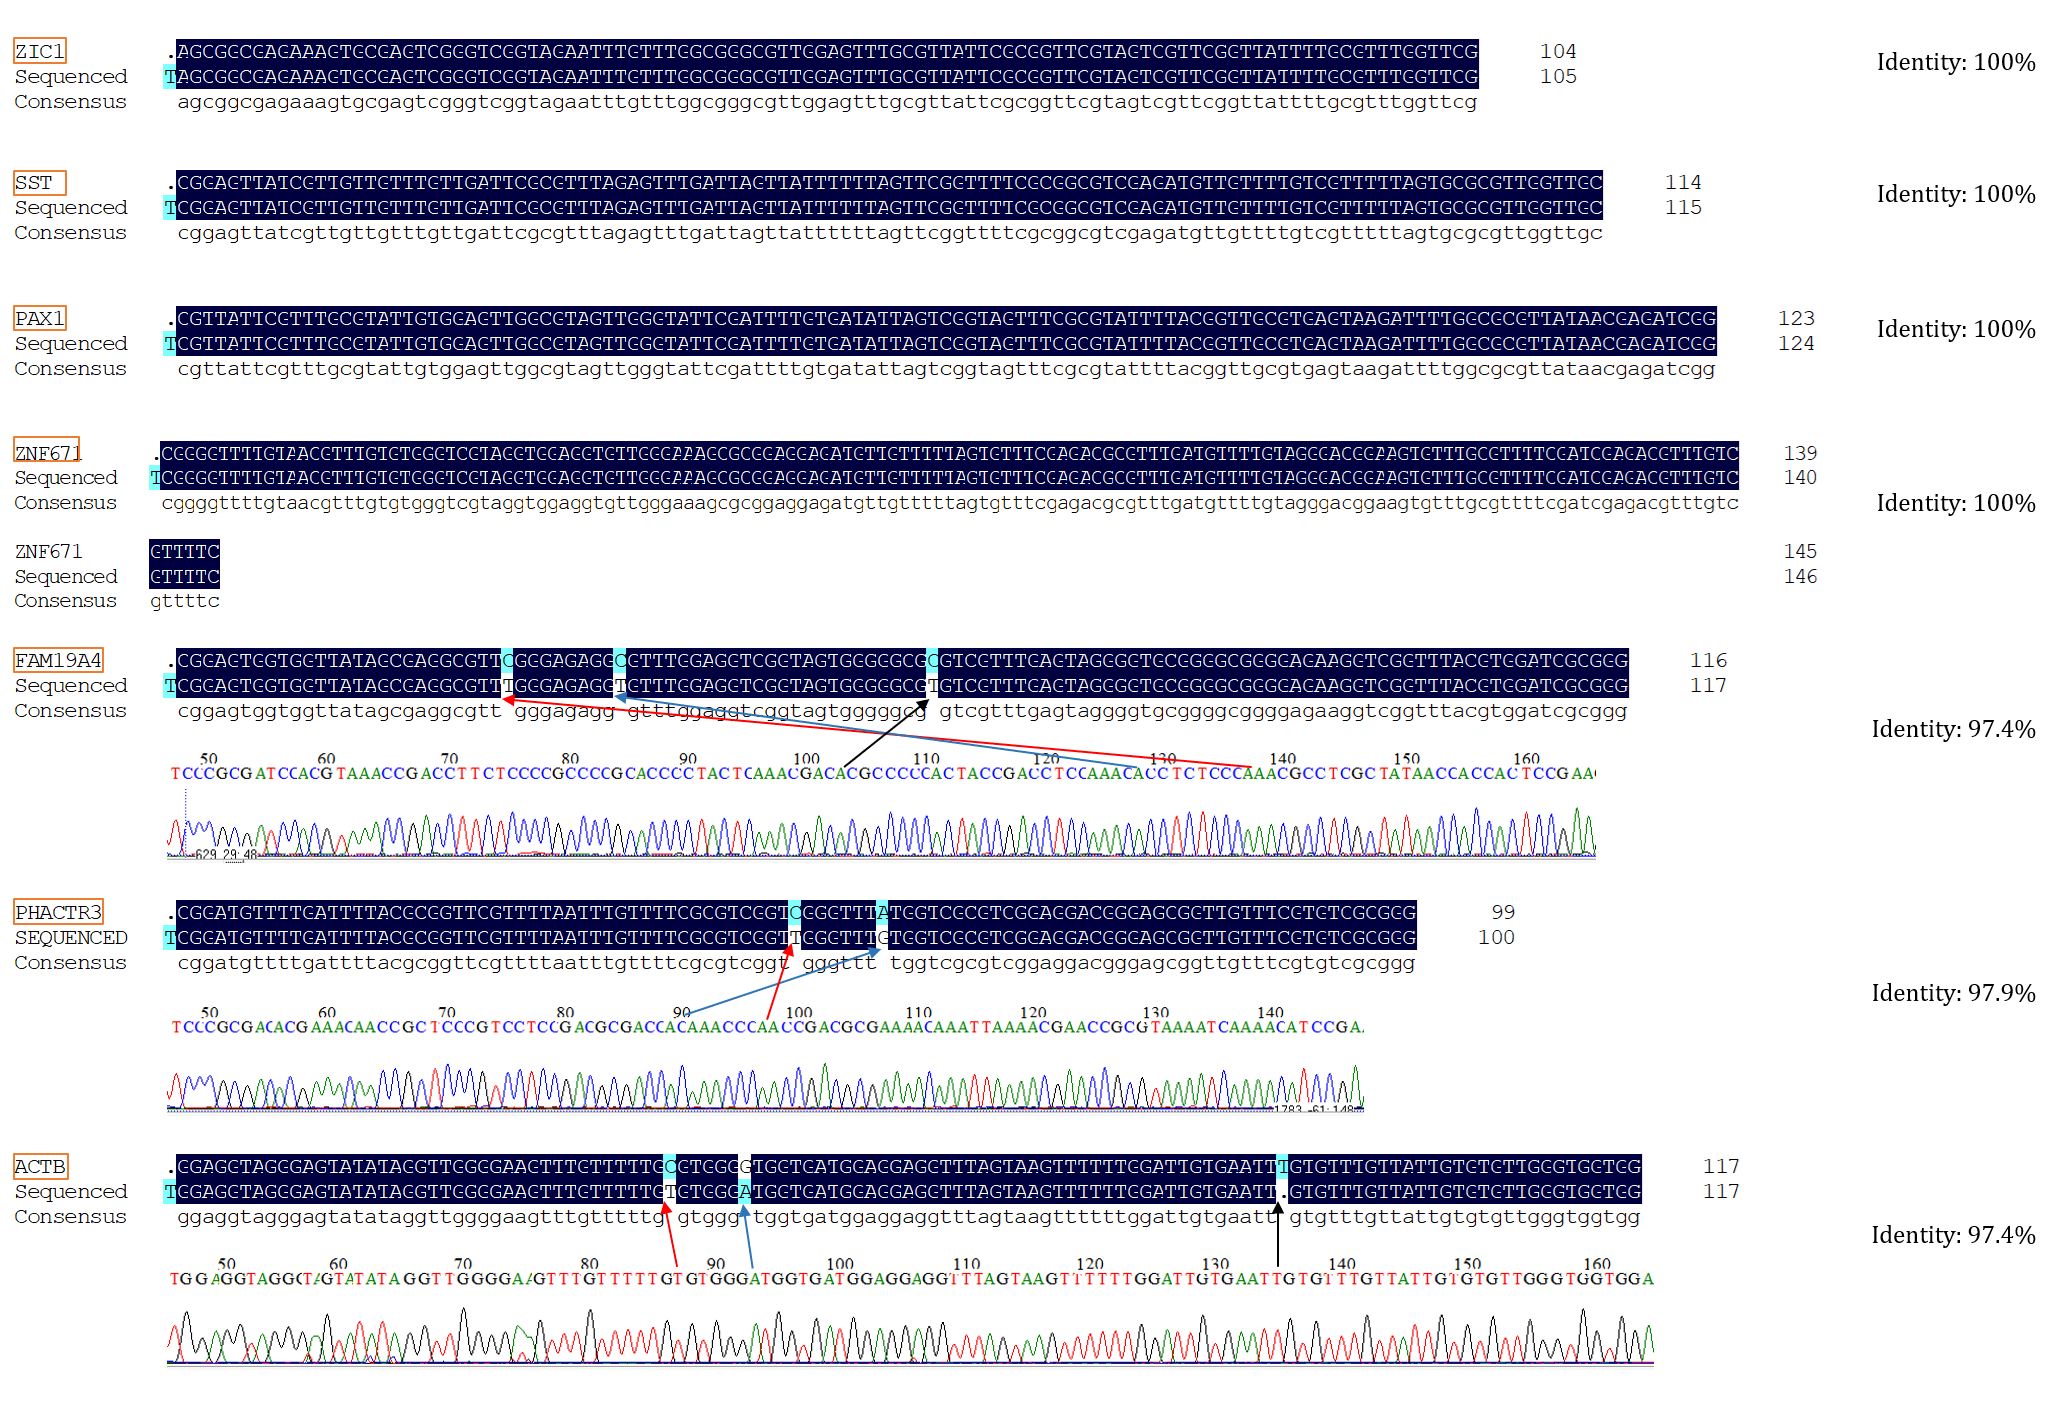

Supplement: Supplementary file 1 [file get_supplementary_file.php]
